# Supplementary material for: Optimal Allocation of Territorial Space in the Minjiang River Basin Based on a Double Optimization Simulation Model
Source: MDPI journal article supplement (doi:10.3390/land12111989), 2023-10-30
Supplement: s1 [file s1]

## Supplementary File

### 1. Supplementary tables and figures.

**Table S1.** Distribution of Counties in the Minjiang River Basin.

| Prefectural-level division | Districts and counties                                                                                                                                          |
|----------------------------|-----------------------------------------------------------------------------------------------------------------------------------------------------------------|
| Aba                        | Songpan, Heishui, Maoxian, Lixian, Wenchuan                                                                                                                     |
| Chengdu                    | Dujiangyan, Pidu, Wenjiang, Chongzhou, Dayi, Chengdu urban area (Jinjiang, Qingyang, Jinniu, Wuhou, Chenghua, Longquanyi), Shuangliu, Xinjin, Qionglai, Pujiang |
| Meishan                    | Pengshan, Dongpo, Danling, Hongya, Renshou, Qingshen                                                                                                            |
| Leshan                     | Shizhong, Wutongqiao, Shawan, Jiajiang, Emeishan City, Jingyan, Qianwei, Muchuan                                                                                |
| Zigong                     | Rongxian                                                                                                                                                        |
| Yibin                      | Cuiping, Xuzhou                                                                                                                                                 |

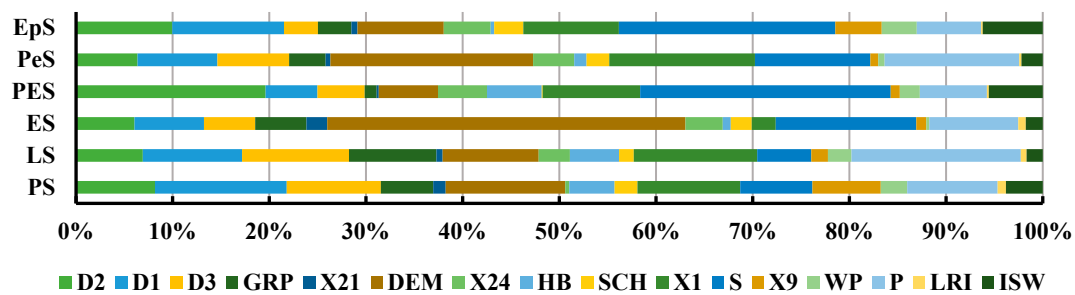

**Figure S1.** Contributions of driving factors in the Minjiang River Basin.

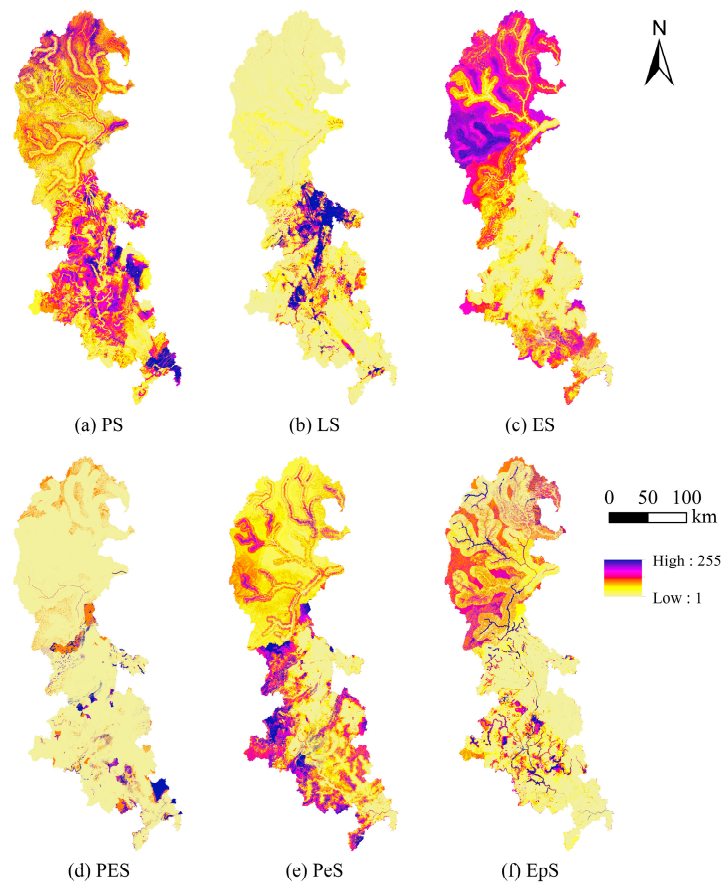

**Figure S2.** Growth probabilities of territorial space.

**Table S2.** Evaluation index system of territorial space development and utilization effect.

| Type               | Index (unit)                | Attribute                                                                                                                                                       | Definition                                                                                               | Weight |
|--------------------|-----------------------------|-----------------------------------------------------------------------------------------------------------------------------------------------------------------|----------------------------------------------------------------------------------------------------------|--------|
| Social effects     | Population situation        | Population density                                                                                                                                              | Raster data                                                                                              | 0.1234 |
|                    |                             | Urbanization rate (%)                                                                                                                                           | Statistical yearbook                                                                                     | 0.0473 |
|                    |                             | Nonfarm payrolls ratio (%)                                                                                                                                      | (Total employment – Number of employees in the primary industry) / Total employment × 100%               | 0.0231 |
|                    | Cultural education          | Number of education (primary, secondary) schools per 10 <sup>4</sup> people                                                                                     | Number of primary and secondary schools / Population                                                     | 0.1295 |
|                    |                             | Number of students enrollment of primary and secondary schools per 10 <sup>4</sup> people                                                                       | (Students enrollment of primary schools + Students enrollment of regular secondary schools) / Population | 0.0800 |
|                    |                             | Each primary school teacher is responsible for the number of students                                                                                           | Students enrollment of primary schools / Teachers of primary schools                                     | 0.0184 |
|                    |                             | Each secondary school teacher is responsible for the number of students                                                                                         | Students enrollment of regular secondary schools / Teachers of secondary schools                         | 0.0217 |
|                    | Urban-rural construction    | Traffic accessibility (km/km <sup>2</sup> )                                                                                                                     | Length of highway / Gross area                                                                           | 0.0378 |
|                    |                             | Number of beds in health institutions per 10 <sup>4</sup> people                                                                                                | Number of beds in health institutions / Population                                                       | 0.0502 |
|                    |                             | Urban-rural income ratio (%)                                                                                                                                    | Per capita urban disposable income / Per capita rural disposable income × 100%                           | 0.0354 |
|                    |                             | Number of local telephone subscribers per 10 <sup>4</sup> people                                                                                                | Number of local telephone subscribers / Population                                                       | 0.0676 |
|                    |                             | Number of mobile telephones subscribers per 10 <sup>4</sup> people                                                                                              | Number of mobile telephones subscribers / Population                                                     | 0.0428 |
|                    |                             | Total retail sales of consumer goods (10 <sup>4</sup> yuan)                                                                                                     | Statistical yearbook                                                                                     | 0.3228 |
| Economic effects   | Economic level              | Per area gross regional product (10 <sup>4</sup> yuan/km <sup>2</sup> )                                                                                         | Raster data                                                                                              | 0.1920 |
|                    |                             | Economic growth rate (%)                                                                                                                                        | Statistical yearbook                                                                                     | 0.0331 |
|                    |                             | Per area fixed asset investment (10 <sup>4</sup> yuan/km <sup>2</sup> )                                                                                         | Total investment / Gross area                                                                            | 0.1252 |
|                    |                             | Local financial general budgetary revenue (10 <sup>4</sup> yuan)                                                                                                | Statistical yearbook                                                                                     | 0.2547 |
|                    |                             | Balance of saving deposits of urban and rural residents (10 <sup>4</sup> yuan)                                                                                  | Statistical yearbook                                                                                     | 0.1963 |
|                    | Industrial development      | Gross output value of farming, forestry, animal husbandry and fishery (10 <sup>4</sup> yuan)                                                                    | Statistical yearbook                                                                                     | 0.0427 |
|                    |                             | Indices of gross output value of all state-owned industrial enterprises and non-state-owned industrial enterprises above designated size (Preceding year = 100) | The report period constant price output value / Base period constant price output value × 100            | 0.0072 |
|                    |                             | Number of all state-owned industrial enterprises and non-state-owned industrial enterprises above designated size                                               | Statistical yearbook                                                                                     | 0.0764 |
|                    |                             | The rationalization of industrial structure                                                                                                                     | Equation (S1) [1]                                                                                        | 0.0108 |
|                    |                             | Industrial structure upgrade                                                                                                                                    | Gross output value of the tertiary industry / Gross output value of the secondary industry               | 0.0616 |
| Ecological effects | Environmental level         | Carbon emission intensity (t/10 <sup>4</sup> yuan)                                                                                                              | Carbon emission / GDP                                                                                    | 0.0081 |
|                    |                             | Carbon emission per capita                                                                                                                                      | Carbon emission / Population                                                                             | 0.0144 |
|                    |                             | Eco-environmental quality index                                                                                                                                 | Raster data                                                                                              | 0.0372 |
|                    |                             | Whole-year mean value of PM2.5 (μg/m <sup>3</sup> )                                                                                                             | Raster data                                                                                              | 0.0448 |
|                    | Resource state              | Cultivated land area per capita                                                                                                                                 | Cultivated land area / Population                                                                        | 0.0417 |
|                    |                             | Water capacity per capita                                                                                                                                       | Water resources / Population                                                                             | 0.3037 |
|                    |                             | Produced water modulus (10 <sup>4</sup> m <sup>3</sup> /km <sup>2</sup> )                                                                                       | Water resources / Gross area                                                                             | 0.0691 |
|                    | Consumption and utilization | Water resources utilization ratio (%)                                                                                                                           | Water consumption / Water resources × 100%                                                               | 0.1485 |
|                    |                             | Land reclaimed index (%)                                                                                                                                        | Cultivated land area / Gross area × 100%                                                                 | 0.0496 |
|                    |                             | Effective irrigation index (%)                                                                                                                                  | Effective irrigation area / Total sown area × 100%                                                       | 0.0244 |
|                    |                             | Fertilizer input intensity (g/m <sup>2</sup> )                                                                                                                  | Consumption of chemical fertilizers / Cultivated land area                                               | 0.0168 |
|                    |                             | Water consumption per GDP (m <sup>3</sup> /10 <sup>4</sup> yuan)                                                                                                | Water consumption / GDP                                                                                  | 0.0565 |
|                    |                             | Water consumption per capita                                                                                                                                    | Water consumption / Population                                                                           | 0.0245 |
|                    |                             | Household electricity consumption (kW·h)                                                                                                                        | Statistical yearbook                                                                                     | 0.0080 |
|                    | Management                  | Common industrial solid wastes comprehensively utilized (10 <sup>4</sup> t)                                                                                     | Statistical yearbook                                                                                     | 0.1433 |
|                    |                             | Wastewater treatment rate (%)                                                                                                                                   | Statistical yearbook                                                                                     | 0.0094 |

$$TL = \sum_{j=1}^J \left( \frac{Y_j}{Y} \right) \ln \left( \frac{Y_j}{L_j} / \frac{Y}{L} \right) \quad (S1)$$

where  $TL$  is the rationalization of industrial structure;  $Y$  and  $Y_j$  represent total output value and the output value of the  $j$  industry, respectively;  $L$  and  $L_j$  denote the total employment and employment in the  $j$  industry, respectively.

**Table S3.** Territorial space quantity structure under natural development scenario in 2030.

| Territorial space types | Area/km <sup>2</sup> | Proportion/% |
|-------------------------|----------------------|--------------|
| PS                      | 660.70               | 1.25         |
| LS                      | 1972.19              | 3.72         |
| ES                      | 32065.77             | 60.44        |
| PES                     | 207.65               | 0.39         |
| PeS                     | 17605.11             | 33.19        |
| EpS                     | 538.24               | 1.01         |

**Table S4.** Driving factors.

| Index                                                                    | Unit                 |
|--------------------------------------------------------------------------|----------------------|
| Per area gross regional product (GRP)                                    | 10 <sup>4</sup> yuan |
| Value-added of the primary industry (X21)                                | 10 <sup>4</sup> yuan |
| Total profits from sales of industrial products (X24)                    | 10 <sup>4</sup> yuan |
| DEM (DEM)                                                                | m                    |
| Slope (S)                                                                | \                    |
| Annual precipitation (X1)                                                | mm                   |
| Distance from the river system (D1)                                      | m                    |
| Per capita water capacity (WP)                                           | m <sup>3</sup>       |
| Land Reclaimed index (LRI)                                               | %                    |
| Common industrial solid wastes comprehensively utilized (ISW)            | 10 <sup>4</sup> t    |
| Population density (P)                                                   | \                    |
| Distance from the expressway (D2)                                        | m                    |
| Number of primary and secondary schools per 10 <sup>4</sup> people (SCH) | \                    |
| Number of beds in health institutions per 10 <sup>4</sup> people (HB)    | \                    |
| Per capita residential land area (X9)                                    | m <sup>2</sup>       |
| Distance from the railway (D3)                                           | m                    |

**Table S5.** Territorial space transfer matrix for the Minjiang River Basin from 2020 to 2030 under natural development scenario.

(unit: km<sup>2</sup>)

| Year | Territorial space types | 2030             |                    |                    |                  |                    |                   | Total    |
|------|-------------------------|------------------|--------------------|--------------------|------------------|--------------------|-------------------|----------|
|      |                         | PS               | LS                 | ES                 | PES              | PeS                | EpS               |          |
| 2020 | PS                      | 438.42<br>99.94% | \                  | 0.01<br>0.01%      | \                | 0.24<br>0.05%      | \                 | 438.67   |
|      | LS                      | \                | 1835.47<br>100.00% | \                  | \                | \                  | \                 | 1835.47  |
|      | ES                      | 11.20<br>0.03%   | 4.02<br>0.01%      | 32036.33<br>99.82% | \                | 37.45<br>0.12%     | 5.32<br>0.02%     | 32094.32 |
|      | PES                     | 0.23<br>0.11%    | 0.58<br>0.28%      | \                  | 207.65<br>99.58% | \                  | 0.06<br>0.03%     | 208.52   |
|      | PeS                     | 210.84<br>1.18%  | 132.11<br>0.74%    | 29.43<br>0.16%     | \                | 17567.42<br>97.91% | 2.47<br>0.01%     | 17942.28 |
|      | EpS                     | \                | \                  | \                  | \                | \                  | 530.39<br>100.00% | 530.39   |
|      | Total                   | 660.70           | 1972.19            | 32065.77           | 207.65           | 17605.11           | 538.24            | 53049.65 |

**Table S6.** Territorial space transfer matrix for the Minjiang River Basin from 2020 to 2030 under double optimization scenario.

(unit: km<sup>2</sup>)

| Year | Territorial space types | 2030             |                    |                    |                  |                    |                  | Total    |
|------|-------------------------|------------------|--------------------|--------------------|------------------|--------------------|------------------|----------|
|      |                         | PS               | LS                 | ES                 | PES              | PeS                | EpS              |          |
| 2020 | PS                      | 438.49<br>99.96% | \                  | \                  | \                | 0.13<br>0.03%      | 0.05<br>0.01%    | 438.67   |
|      | LS                      | \                | 1835.47<br>100.00% | \                  | \                | \                  | \                | 1835.47  |
|      | ES                      | 3.16<br>0.01%    | 0.73<br>0.002%     | 32087.90<br>99.98% | \                | \                  | 2.54<br>0.008%   | 32094.32 |
|      | PES                     | 0.08<br>0.04%    | 0.06<br>0.03%      | \                  | 208.35<br>99.92% | \                  | 0.02<br>0.01%    | 208.52   |
|      | PeS                     | 107.38<br>0.60%  | 21.72<br>0.12%     | \                  | \                | 17806.60<br>99.24% | 6.59<br>0.04%    | 17942.28 |
|      | EpS                     | 0.37<br>0.07%    | \                  | \                  | \                | 0.98<br>0.18%      | 529.04<br>99.75% | 530.39   |
|      | Total                   | 549.47           | 1857.98            | 32087.90           | 208.35           | 17807.71           | 538.24           | 53049.65 |

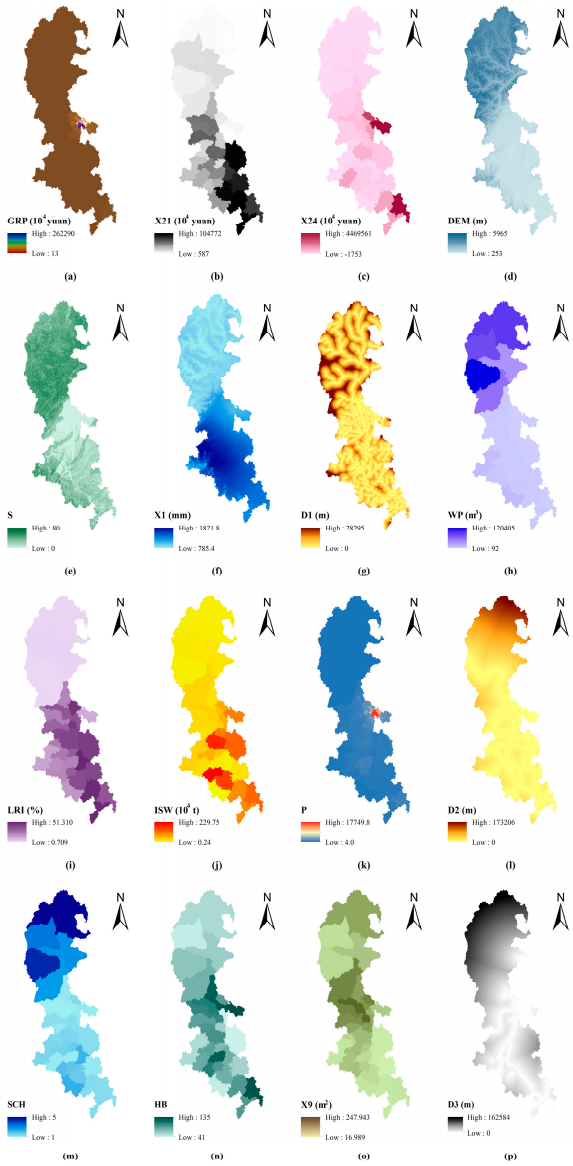

**Figure S3.** Driving factors.
